# Supplementary material
Source: PubMed Central journal article supplement (PMC5108195)
Supplement: CJN.03900416SupplementaryData.pdf [file CJN.03900416SupplementaryData.pdf]

## **Supplement for “The use of electronic health data to estimate heart failure events in a population-based CKD cohort”**

Authors:

James S. Floyd, MD, MS

Robert Wellman, MS

Sharon Fuller, BA

Nisha Bansal, MD, MAS

Bruce M. Psaty, MD, PhD

Ian H. de Boer, MD, MS

Delia Scholes, PhD

Affiliations: Cardiovascular Health Research Unit (Floyd, Psaty), Departments of Epidemiology (de Boer, Floyd, Psaty), Health Services (Psaty), and Medicine (Bansal, de Boer, Floyd, Psaty), Kidney Research Institute (Bansal, de Boer), University of Washington, Seattle, WA; Group Health Research Institute, Seattle, WA (Fuller, Psaty, Scholes, Wellman)

### **Supplemental Legend:**

**Supplemental Table 1.** *International Classification of Disease, Ninth Revision (ICD-9)* codes used to identify health conditions.

**Supplemental Table 2.** Incidence rates for heart failure events in a chronic kidney disease cohort according to case-identification algorithm, subgroup with prevalent heart failure at baseline.

**Supplemental Table 3.** Incidence rates for heart failure events in a chronic kidney disease cohort according to case-identification algorithm, subgroup with no prevalent heart failure at baseline.

**Supplemental Table 4.** Incidence rates for heart failure events in a chronic kidney disease cohort by sex, age, and eGFR.

Supplemental Table 1. *International Classification of Disease, Ninth Revision (ICD-9)* codes used to identify health conditions.

| Condition               | ICD-9 codes                |
|-------------------------|----------------------------|
| Myocardial infarction   | 410                        |
| Stroke                  | 430, 431, 432.9, 434, 436  |
| Heart failure           | 402.x1, 404.x1, 425.4, 428 |
| End stage renal disease | 585.6                      |
| Paget's disease         | 731                        |
| Metastatic cancer       | 196, 197, 198, 199         |

Supplemental Table 2. Incidence rates for heart failure events in a chronic kidney disease cohort according to case-identification algorithm, **subgroup with prevalent heart failure at baseline.**

|                                                    | Estimated HF events | Person-years | Rate (95% CI)         | % of events identified* |
|----------------------------------------------------|---------------------|--------------|-----------------------|-------------------------|
| <b>Diagnosis-code only events</b>                  |                     |              |                       |                         |
| Principal diagnosis hospitalizations               | 172                 | 3,479        | 49.4 (42.6 - 57.4)    | 41%                     |
| <b>Events estimated from validation results</b>    |                     |              |                       |                         |
| Principal diagnosis hospitalizations               | 169                 | 3,483        | 48.6 (41.7 - 57.0)    | 40%                     |
| Principal and secondary diagnosis hospitalizations | 425                 | 3,145        | 135.1 (119.5 - 150.6) | 100%                    |

For events estimated from validation results, the number of events, person-time, and incidence rates were averaged across 100 datasets that estimated HF events from hospitalizations and outpatient encounters with heart failure diagnosis codes, based on the positive predicted values from the validation study reported in Table 2. Follow up was censored at the time of a first estimated heart failure event, death, or the end of the study. \*Percentage of heart failure events estimated by the most comprehensive algorithm that included all heart failure hospitalization and outpatient heart failure encounters.

Supplemental Table 3. Incidence rates for heart failure events in a chronic kidney disease cohort according to case-identification algorithm, **subgroup with no prevalent heart failure at baseline.**

|                                                    | Estimated HF events | Person-years | Rate (95% CI), per 1,000 person years | % of events identified* |
|----------------------------------------------------|---------------------|--------------|---------------------------------------|-------------------------|
| <b>Diagnosis-code only events</b>                  |                     |              |                                       |                         |
| Principal diagnosis hospitalizations               | 231                 | 37,595       | 6.1 (5.4 - 7.0)                       | 24%                     |
| <b>Events estimated from validation results</b>    |                     |              |                                       |                         |
| Principal diagnosis hospitalizations               | 223                 | 37,604       | 5.9 (5.1 - 6.8)                       | 23%                     |
| Principal and secondary diagnosis hospitalizations | 693                 | 37,066       | 18.7 (17.1 - 20.4)                    | 71%                     |
| Hospitalizations and outpatient                    | 975                 | 36,629       | 26.6 (24.8 - 28.4)                    | 100%                    |

For events estimated from validation results, the number of events, person-time, and incidence rates were averaged across 100 datasets that estimated HF events from hospitalizations and outpatient encounters with heart failure diagnosis codes, based on the positive predicted values from the validation study reported in Table 2. Follow up was censored at the time of a first estimated heart failure event, death, or the end of the study. \*Percentage of heart failure events estimated by the most comprehensive algorithm that included all heart failure hospitalization and outpatient heart failure encounters.

Supplemental Table 4. Incidence rates for heart failure events in a chronic kidney disease cohort by sex, age, and eGFR.

|                                       | Men    |              |                                       | Women  |              |                                       | Men + Women |              |                                       |
|---------------------------------------|--------|--------------|---------------------------------------|--------|--------------|---------------------------------------|-------------|--------------|---------------------------------------|
|                                       | Events | Person-years | Rate (95% CI), per 1,000 person years | Events | Person-years | Rate (95% CI), per 1,000 person years | Events      | Person-years | Rate (95% CI), per 1,000 person years |
| <b>All persons</b>                    | 615    | 14728        | 41.8 (38.2, 45.4)                     | 782    | 25052        | 31.2 (28.7, 33.8)                     | 1399        | 39770        | 35.2 (33.1, 37.4)                     |
| <b>Age, years</b>                     |        |              |                                       |        |              |                                       |             |              |                                       |
| <60                                   | 36     | 2799         | 12.7 (8.7, 17.6)                      | 49     | 5039         | 9.8 (6.9, 12.9)                       | 85          | 7845         | 10.9 (8.5, 13.7)                      |
| 60 to 69                              | 114    | 4404         | 25.9 (20.9, 31.2)                     | 118    | 6749         | 17.5 (14.0, 21.1)                     | 233         | 11156        | 20.9 (18.0, 24.0)                     |
| 70 to 79                              | 219    | 4730         | 46.3 (39.4, 53.4)                     | 272    | 7312         | 37.2 (32.4, 42.4)                     | 492         | 12038        | 40.9 (37.0, 45.5)                     |
| 80+                                   | 249    | 2787         | 89.2 (76.1, 102.0)                    | 342    | 5950         | 57.5 (50.5, 64.8)                     | 590         | 8731         | 67.6 (61.5, 74.2)                     |
| <b>eGFR, mL/min/1.73m<sup>2</sup></b> |        |              |                                       |        |              |                                       |             |              |                                       |
| 45 to 59                              | 341    | 11192        | 30.5 (26.8, 34.3)                     | 416    | 18565        | 22.4 (20.0, 24.8)                     | 758         | 29753        | 25.5 (23.5, 27.6)                     |
| 30 to 44                              | 226    | 3111         | 72.7 (62.3, 83.9)                     | 292    | 5751         | 50.8 (44.1, 57.8)                     | 520         | 8865         | 58.7 (53.2, 64.4)                     |
| 20 to 29                              | 50     | 417          | 119.9 (84.3, 160.5)                   | 73     | 734          | 99.3 (74.9, 125.6)                    | 122         | 1152         | 106.3 (85.8, 128.0)                   |

The estimated number of events, person-time, and incidence rates were averaged across 100 datasets that estimated HF events from hospitalizations and outpatient encounters with heart failure diagnosis codes, based on the positive predicted values from the validation study reported in Table 2.
